# Supplementary material for: Whole Genome Sequencing Increases Molecular Diagnostic Yield Compared with Current Diagnostic Testing for Inherited Retinal Disease
Source: PubMed Central journal article supplement (PMC4845717; doi:10.1016/j.ophtha.2016.01.009), 2016-05
Supplement: mmc1.pdf [file mmc1.pdf]

**Table 1. Specified transcripts for 105 gene symbols analysed by targeted NGS diagnostic testing.**

| <b>HGNC symbol</b> | <b>RefSeq Transcript ID</b> | <b>HGNC symbol</b> | <b>RefSeq Transcript ID</b> | <b>HGNC symbol</b> | <b>RefSeq Transcript ID</b> |
|--------------------|-----------------------------|--------------------|-----------------------------|--------------------|-----------------------------|
| <i>ABCA4</i>       | NM_000350.2                 | <i>PRPF31</i>      | NM_015629.3                 | <i>IMPG2</i>       | NM_016247.3                 |
| <i>ADAM9</i>       | NM_003816.2                 | <i>PRPF6</i>       | NM_012469.3                 | <i>KCNV2</i>       | NM_133497.3                 |
| <i>AIP1</i>        | NM_014336.3                 | <i>PRPF8</i>       | NM_006445.3                 | <i>KLHL7</i>       | NM_001031710.2              |
| <i>ARL6</i>        | NM_032146.3                 | <i>PRPH2</i>       | NM_000322.4                 | <i>IMPG2</i>       | NM_016247.3                 |
| <i>BBS1</i>        | NM_024649.4                 | <i>RAX2</i>        | NM_032753.3                 | <i>KCNV2</i>       | NM_133497.3                 |
| <i>BBS10</i>       | NM_024685.3                 | <i>RBP3</i>        | NM_002900.2                 | <i>KLHL7</i>       | NM_001031710.2              |
| <i>BBS12</i>       | NM_001178007.1              | <i>RD3</i>         | NM_183059.2                 | <i>LCA5</i>        | NM_181714.3                 |
| <i>BBS2</i>        | NM_031885.3                 | <i>RDH12</i>       | NM_152443.2                 | <i>LRAT</i>        | NM_004744.3                 |
| <i>BBS4</i>        | NM_033028.3                 | <i>RDH5</i>        | NM_001199771.1              | <i>LRP5</i>        | NM_002335.2                 |
| <i>BBS5</i>        | NM_152384.2                 | <i>RGR</i>         | NM_002921.3                 | <i>MERTK</i>       | NM_006343.2                 |
| <i>BBS7</i>        | NM_176824.2                 | <i>RGS9</i>        | NM_001165933.1              | <i>MKKS</i>        | NM_018848.2                 |
| <i>BBS7</i>        | NM_018190.3                 | <i>RGS9</i>        | NM_003835.3                 | <i>MKS1</i>        | NM_001165927.1              |
| <i>BBS9</i>        | NM_198428.2                 | <i>RHO</i>         | NM_000539.3                 | <i>MKS1</i>        | NM_017777.3                 |
| <i>BEST1</i>       | NM_004183.3                 | <i>RIMS1</i>       | NM_014989.4                 | <i>MYO7A</i>       | NM_000260.3                 |
| <i>CIQTNF5</i>     | NM_015645.3                 | <i>RIMS1</i>       | NM_001168407.1              | <i>NDP</i>         | NM_000266.3                 |
| <i>C2orf71</i>     | NM_001029883.1              | <i>CRB1</i>        | NM_201253.2                 | <i>RIMS1</i>       | NM_001168410.1              |
| <i>CA4</i>         | NM_000717.3                 | <i>CRX</i>         | NM_000554.4                 | <i>RLBP1</i>       | NM_000326.4                 |
| <i>CACNA2D4</i>    | NM_172364.4                 | <i>DFNB31</i>      | NM_015404.3                 | <i>ROM1</i>        | NM_000327.3                 |
| <i>CDH23</i>       | NM_022124.5                 | <i>DHDDS</i>       | NM_024887.2                 | <i>RP1</i>         | NM_006269.1                 |
| <i>CDHR1</i>       | NM_001171971.1              | <i>EFEMP1</i>      | NM_001039348.2              | <i>RP1L1**</i>     | NM_178857.5                 |
| <i>CDHR1</i>       | NM_033100.2                 | <i>ELOVL4</i>      | NM_022726.3                 | <i>RP2</i>         | NM_006915.2                 |
| <i>CEP290*</i>     | NM_025114.3                 | <i>EYS</i>         | NM_001142800.1              | <i>RP9</i>         | NM_203288.1                 |
| <i>CERKL</i>       | NM_001030311.2              | <i>FAM161A</i>     | NM_001201543.1              | <i>RPE65</i>       | NM_000329.2                 |
| <i>CHM</i>         | NM_000390.2                 | <i>FSCN2</i>       | NM_001077182.2              | <i>RPGR***</i>     | NM_001034853.1              |
| <i>CLRN1</i>       | NM_052995.2                 | <i>FZD4</i>        | NM_012193.3                 | <i>RPGRIP1</i>     | NM_020366.3                 |
| <i>CLRN1</i>       | NM_001195794.1              | <i>GNAT2</i>       | NM_005272.3                 | <i>RS1</i>         | NM_000330.3                 |
| <i>CNGA1</i>       | NM_001142564.1              | <i>GPR98</i>       | NM_032119.3                 | <i>SAG</i>         | NM_000541.4                 |
| <i>CNGA3</i>       | NM_001298.2                 | <i>GUCA1A</i>      | NM_000409.3                 | <i>SEMA4A</i>      | NM_022367.3                 |
| <i>CNGB1</i>       | NM_001297.4                 | <i>GUCA1B</i>      | NM_002098.5                 | <i>SNRNP200</i>    | NM_014014.4                 |
| <i>CNGB3</i>       | NM_019098.4                 | <i>GUCY2D</i>      | NM_000180.3                 | <i>SPATA7</i>      | NM_018418.4                 |
| <i>NR2E3</i>       | NM_014249.2                 | <i>IDH3B</i>       | NM_006899.2                 | <i>TEAD1</i>       | NM_021961.5                 |
| <i>NRL</i>         | NM_006177.3                 | <i>IDH3B</i>       | NM_174855.1                 | <i>TIMP3</i>       | NM_000362.4                 |
| <i>OTX2</i>        | NM_021728.2                 | <i>IMPDH1</i>      | NM_000883.3                 | <i>TOPORS</i>      | NM_005802.4                 |
| <i>PCDH15</i>      | NM_001142763.1              | <i>IMPG2</i>       | NM_016247.3                 | <i>TRIM32</i>      | NM_012210.3                 |
| <i>PCDH15</i>      | NM_001142769.1              | <i>KCNV2</i>       | NM_133497.3                 | <i>TTC8</i>        | NM_144596.2                 |
| <i>PCDH15</i>      | NM_001142771.1              | <i>KLHL7</i>       | NM_001031710.2              | <i>TULP1</i>       | NM_003322.3                 |
| <i>PCDH15</i>      | NM_001142770.1              | <i>LCA5</i>        | NM_181714.3                 | <i>UNC119</i>      | NM_005148.3                 |
| <i>PDE6A</i>       | NM_000440.2                 | <i>LRAT</i>        | NM_004744.3                 | <i>UNC119</i>      | NM_054035.2                 |
| <i>PDE6B</i>       | NM_000283.3                 | <i>LRP5</i>        | NM_002335.2                 | <i>USH1C</i>       | NM_005709.3                 |
| <i>PDE6C</i>       | NM_006204.3                 | <i>MERTK</i>       | NM_006343.2                 | <i>USH1C</i>       | NM_153676.3                 |
| <i>PDE6G</i>       | NM_002602.3                 | <i>MKKS</i>        | NM_018848.2                 | <i>USH1G</i>       | NM_173477.2                 |
| <i>PITPNM3</i>     | NM_031220.3                 | <i>MKS1</i>        | NM_001165927.1              | <i>USH2A</i>       | NM_206933.2                 |
| <i>PRCD</i>        | NM_001077620.2              | <i>MKS1</i>        | NM_017777.3                 | <i>ZNF513</i>      | NM_144631.5                 |
| <i>PROM1</i>       | NM_006017.2                 | <i>MYO7A</i>       | NM_000260.3                 |                    |                             |
| <i>PRPF3</i>       | NM_004698.2                 | <i>NDP</i>         | NM_000266.3                 |                    |                             |

\* Testing of the common intron 26 mutation c.2991+1655A>G in CEP290 is included in this analysis

\*\* Analysis of the coding region of exon 4 of the RP1L1 gene is not included

\*\*\* Analysis of the coding region of the final exon (*orf15*) of *RPGR* it is not included *HGNC*, gene symbols approved by the HUGO Gene Nomenclature Committee<sup>1</sup>

1. Gray KA, Yates B, Seal RL, Wright MW, Bruford EA. Genenames.org: the HGNC resources in 2015. *Nucleic Acids Res* 2015;43:D1079-85.
