# Supplementary material for: Whole Genome Sequencing Increases Molecular Diagnostic Yield Compared with Current Diagnostic Testing for Inherited Retinal Disease
Source: PubMed Central journal article supplement (PMC4845717; doi:10.1016/j.ophtha.2016.01.009), 2016-05
Supplement: mmc2.pdf [file mmc2.pdf]

**Table 2. Gene symbols approved by the HUGO Gene Nomenclature Committee<sup>1</sup> for the 180 genes previously associated with inherited retinal disease utilized during the analysis of whole genome sequencing data.**

| <b>Gene Symbol</b> | <b>MIM ID</b> | <b>Gene Symbol</b> | <b>MIM ID</b> | <b>Gene Symbol</b> | <b>MIM ID</b> |
|--------------------|---------------|--------------------|---------------|--------------------|---------------|
| <i>ABCA4</i>       | 601691        | <i>CNGA1</i>       | 123825        | <i>IQCB1</i>       | 609237        |
| <i>ABHD12</i>      | 613599        | <i>CNGA3</i>       | 600053        | <i>ITM2B</i>       | 603904        |
| <i>ACBD5</i>       | 23338*        | <i>CNGB1</i>       | 600724        | <i>KCNJ13</i>      | 603208        |
| <i>ADAM9</i>       | 602713        | <i>CNGB3</i>       | 605080        | <i>KCNV2</i>       | 607604        |
| <i>ADAMTS18</i>    | 607512        | <i>CNNM4</i>       | 607805        | <i>KIAA1549</i>    | 613344        |
| <i>AH11</i>        | 608894        | <i>CRB1</i>        | 604210        | <i>KIF11</i>       | 148760        |
| <i>AIPL1</i>       | 604392        | <i>CRX</i>         | 602225        | <i>KLHL7</i>       | 611119        |
| <i>ALMS1</i>       | 606844        | <i>CSPP1</i>       | 611654        | <i>LCA5</i>        | 611408        |
| <i>ARL2BP</i>      | 615407        | <i>CYP4V2</i>      | 608614        | <i>LRAT</i>        | 604863        |
| <i>ARL6</i>        | 608845        | <i>DFNB31</i>      | 607084        | <i>LRIT3</i>       | 615004        |
| <i>BBIP1</i>       | 615995        | <i>DHDDS</i>       | 608172        | <i>LRP5</i>        | 603506        |
| <i>BBS1</i>        | 209901        | <i>DTHD1</i>       | 37261*        | <i>LZTFL1</i>      | 606568        |
| <i>BBS10</i>       | 610148        | <i>EFEMP1</i>      | 601548        | <i>MAK</i>         | 154235        |
| <i>BBS12</i>       | 610683        | <i>ELOVL4</i>      | 605512        | <i>MERTK</i>       | 604705        |
| <i>BBS2</i>        | 606151        | <i>EMC1</i>        | 28957*        | <i>MFRP</i>        | 606227        |
| <i>BBS4</i>        | 600374        | <i>EYS</i>         | 612424        | <i>MKKS</i>        | 604896        |
| <i>BBS5</i>        | 603650        | <i>FAM161A</i>     | 613596        | <i>MKS1</i>        | 609883        |
| <i>BBS7</i>        | 607590        | <i>FLVCR1</i>      | 609144        | <i>MVK</i>         | 251170        |
| <i>BBS9</i>        | 615986        | <i>FSCN2</i>       | 607643        | <i>MYO7A</i>       | 276903        |
| <i>BEST1</i>       | 607854        | <i>FZD4</i>        | 604579        | <i>NDP</i>         | 300658        |
| <i>C1QTNF5</i>     | 608752        | <i>GNAT1</i>       | 139330        | <i>NEK2</i>        | 604043        |
| <i>C21orf2</i>     | 603191        | <i>GNAT2</i>       | 139340        | <i>NMNAT1</i>      | 608700        |
| <i>C2orf71</i>     | 613425        | <i>GNPTG</i>       | 607838        | <i>NPHP1</i>       | 607100        |
| <i>C8orf37</i>     | 614477        | <i>GPR125</i>      | 612303        | <i>NPHP3</i>       | 608002        |
| <i>CA4</i>         | 114760        | <i>GPR179</i>      | 614515        | <i>NPHP4</i>       | 607215        |
| <i>CABP4</i>       | 608965        | <i>GPR98</i>       | 602851        | <i>NR2E3</i>       | 604485        |
| <i>CACNA1F</i>     | 300110        | <i>GRK1</i>        | 180381        | <i>NRL</i>         | 162080        |
| <i>CACNA2D4</i>    | 608171        | <i>GRM6</i>        | 604096        | <i>NYX</i>         | 300278        |
| <i>CAPN5</i>       | 602537        | <i>GUCA1A</i>      | 600364        | <i>OAT</i>         | 613349        |
| <i>CC2D2A</i>      | 612013        | <i>GUCA1B</i>      | 602275        | <i>OFD1</i>        | 300170        |
| <i>CDH23</i>       | 605516        | <i>GUCY2D</i>      | 600179        | <i>OTX2</i>        | 600037        |
| <i>CDH3</i>        | 114021        | <i>HARS</i>        | 142810        | <i>PANK2</i>       | 606157        |
| <i>CDHR1</i>       | 609502        | <i>HMX1</i>        | 142992        | <i>PCDH15</i>      | 605514        |
| <i>CEP164</i>      | 614848        | <i>IDH3B</i>       | 604526        | <i>PCYT1A</i>      | 123695        |
| <i>CEP290</i>      | 610142        | <i>IFT140</i>      | 614620        | <i>PDE6A</i>       | 180071        |
| <i>CERKL</i>       | 608381        | <i>IMPDH1</i>      | 146690        | <i>PDE6B</i>       | 180072        |
| <i>CHM</i>         | 300390        | <i>IMPG1</i>       | 602870        | <i>PDE6C</i>       | 600827        |
| <i>CIB2</i>        | 605564        | <i>IMPG2</i>       | 607056        | <i>PDE6G</i>       | 180073        |

| <b>Gene Symbol</b> | <b>MIM ID</b> | <b>Gene Symbol</b> | <b>MIM ID</b> | <b>Gene Symbol</b> | <b>MIM ID</b> |
|--------------------|---------------|--------------------|---------------|--------------------|---------------|
| <i>CLN3</i>        | 607042        | <i>INPP5E</i>      | 613037        | <i>PEX1</i>        | 602136        |
| <i>CLRN1</i>       | 606397        | <i>INVS</i>        | 243305        | <i>PEX2</i>        | 170993        |
| <i>PEX7</i>        | 601757        | <i>RGS9</i>        | 604067        | <i>TEAD1</i>       | 189967        |
| <i>PHYH</i>        | 602026        | <i>RHO</i>         | 180380        | <i>TIMP3</i>       | 188826        |
| <i>PITPNM3</i>     | 608921        | <i>RIMS1</i>       | 606629        | <i>TMEM237</i>     | 614423        |
| <i>PLA2G5</i>      | 601192        | <i>RLBP1</i>       | 180090        | <i>TOPORS</i>      | 609507        |
| <i>PRCD</i>        | 610598        | <i>ROM1</i>        | 180721        | <i>TRIM32</i>      | 602290        |
| <i>PROM1</i>       | 604365        | <i>RP1</i>         | 603937        | <i>TRPM1</i>       | 603576        |
| <i>PRPF3</i>       | 607301        | <i>RP1L1</i>       | 608581        | <i>TSPAN12</i>     | 613138        |
| <i>PRPF31</i>      | 606419        | <i>RP2</i>         | 300757        | <i>TTC8</i>        | 608132        |
| <i>PRPF4</i>       | 607795        | <i>RP9</i>         | 607331        | <i>TUB</i>         | 601197        |
| <i>PRPF6</i>       | 613979        | <i>RPE65</i>       | 180069        | <i>TULP1</i>       | 602280        |
| <i>PRPF8</i>       | 607300        | <i>RPGR</i>        | 312610        | <i>UNC119</i>      | 604011        |
| <i>PRPH2</i>       | 179605        | <i>RPGRIP1</i>     | 605446        | <i>USH1C</i>       | 605242        |
| <i>RAB28</i>       | 612994        | <i>RPGRIP1L</i>    | 610937        | <i>USH1G</i>       | 607696        |
| <i>RAX2</i>        | 610362        | <i>RS1</i>         | 300839        | <i>USH2A</i>       | 608400        |
| <i>RBP3</i>        | 180290        | <i>SAG</i>         | 181031        | <i>VCAN</i>        | 118661        |
| <i>RBP4</i>        | 180250        | <i>SDCCAG8</i>     | 613524        | <i>VPS13B</i>      | 607817        |
| <i>RD3</i>         | 180040        | <i>SEMA4A</i>      | 607292        | <i>WDPCP</i>       | 613580        |
| <i>RDH12</i>       | 608830        | <i>SLC24A1</i>     | 603617        | <i>WDR19</i>       | 608151        |
| <i>RDH5</i>        | 601617        | <i>SNRNP200</i>    | 601664        | <i>ZNF423</i>      | 604557        |
| <i>RGR</i>         | 600342        | <i>SPATA7</i>      | 609868        | <i>ZNF513</i>      | 613598        |

\*Numerical identifications approved by the HUGO Gene Nomenclature Committee are given when MIM numerical identifiers are unavailable.

1. Gray KA, Yates B, Seal RL, Wright MW, Bruford EA. Genenames.org: the HGNC resources in 2015. *Nucleic Acids Res* 2015;43:D1079-85.
