# Supplementary material for: Whole Genome Sequencing Increases Molecular Diagnostic Yield Compared with Current Diagnostic Testing for Inherited Retinal Disease
Source: PubMed Central journal article supplement (PMC4845717; doi:10.1016/j.ophtha.2016.01.009), 2016-05
Supplement: mmc4.pdf [file mmc4.pdf]

**Table 5. Sensitivity of the WGS pipeline for six control samples after confirmation of discordant sites through Sanger sequencing.**

Regions of interest include the clinically analysed region of 105 genes (Table 1, available at <http://www.aojournal.org/>) and the hypothesized enrichment region (+/- 50 intronic base pairs of the coding region) for 180 genes (Table 2, available at <http://www.aojournal.org/>). *HG* and *NA* refer to the Coriell Institute for Medical Research (<https://www.coriell.org/>) identifiers for the DNA samples used in the analysis.

| <b>Coriell ID</b> | <b># sites surveyed</b> | <b># observed no-calls</b> | <b># observed discordances</b> | <b># observed concordances</b> | <b>True positives</b> | <b>Real false negatives</b> | <b>Sensitivity</b> |
|-------------------|-------------------------|----------------------------|--------------------------------|--------------------------------|-----------------------|-----------------------------|--------------------|
| <b>105-genes</b>  |                         |                            |                                |                                |                       |                             |                    |
| HG01970           | 134                     | 0                          | 1                              | 133                            | 134                   | 0                           | 1.0                |
| NA18533           | 136                     | 0                          | 3                              | 133                            | 136                   | 0                           | 1.0                |
| NA18907           | 180                     | 0                          | 3                              | 177                            | 180                   | 0                           | 1.0                |
| NA19005           | 128                     | 0                          | 4                              | 124                            | 128                   | 0                           | 1.0                |
| NA19194           | 174                     | 0                          | 4                              | 170                            | 174                   | 0                           | 1.0                |
| NA19258           | 176                     | 0                          | 3                              | 173                            | 176                   | 0                           | 1.0                |
|                   |                         |                            |                                |                                |                       |                             | <b>1.0</b>         |
| <b>180-genes</b>  |                         |                            |                                |                                |                       |                             |                    |
| HG01970           | 296                     | 1                          | 4                              | 291                            | 295                   | 1                           | 0.997              |
| NA18533           | 312                     | 1                          | 7                              | 304                            | 311                   | 1                           | 0.997              |
| NA18907           | 385                     | 2                          | 8                              | 375                            | 383                   | 2                           | 0.995              |
| NA19005           | 290                     | 0                          | 8                              | 282                            | 290                   | 0                           | 1.0                |
| NA19194           | 378                     | 2                          | 10                             | 366                            | 376                   | 2                           | 0.995              |
| NA19258           | 374                     | 2                          | 8                              | 364                            | 372                   | 2                           | 0.995              |
|                   |                         |                            |                                |                                |                       |                             | <b>0.996</b>       |

*True positives*, (i) WGS genotype matches Illumina OMNI microarray genotype (*# observed concordances*), or (ii) WGS genotype does not match Illumina OMNI microarray genotype (*# observed discordances*) but Sanger sequencing has proven WGS genotype is correct (see Table 6). *Real false negatives*, (i) WGS genotype has not been identified (*# observed no-calls*), or (ii) WGS genotype does not match Illumina OMNI microarray genotype (*# observed discordances*) and Sanger sequencing has proven WGS genotype is incorrect.
