# Supplementary material for: Whole Genome Sequencing Increases Molecular Diagnostic Yield Compared with Current Diagnostic Testing for Inherited Retinal Disease
Source: PubMed Central journal article supplement (PMC4845717; doi:10.1016/j.ophtha.2016.01.009), 2016-05
Supplement: mmc5.pdf [file mmc5.pdf]

**Table 6. Proven errors in the Illumina OMNI v2.5 microarray at discordant sites detected between the Illumina OMNI v2.5 microarray and the WGS pipeline for six control samples.** *HG* and *NA* refer to the Coriell Institute for Medical Research (<https://www.coriell.org/>) identifiers for the DNA samples used in the analysis.

| Genomic co-ordinate ( <i>hg19</i> ) | Gene            | Annotation | Reference | OMNI microarray |          | WGS pipeline |          | Sanger sequencing |          |
|-------------------------------------|-----------------|------------|-----------|-----------------|----------|--------------|----------|-------------------|----------|
|                                     |                 |            |           | Allele 1        | Allele 2 | Allele 1     | Allele 2 | Allele 1          | Allele 2 |
| <b><i>HG01970</i></b>               |                 |            |           |                 |          |              |          |                   |          |
| chr1:94517166                       | <i>ABCA4</i>    | c.2653+23  | <b>G</b>  | C               | C        | G            | G        | G                 | G        |
| chr3:150690476                      | <i>CLRN1</i>    | c.20       | <b>T</b>  | A               | A        | T            | T        | T                 | T        |
| chr4:15982166                       | <i>PROM1</i>    | c.2374-6   | <b>A</b>  | G               | G        | A            | A        | A                 | A        |
| chr11:76895772                      | <i>MYO7A</i>    | c.3503+12  | <b>G</b>  | A               | A        | del22        | del22    | del22             | del22    |
| <b><i>NAI8533</i></b>               |                 |            |           |                 |          |              |          |                   |          |
| chr1:94517166                       | <i>ABCA4</i>    | c.2653+23  | <b>G</b>  | C               | C        | G            | G        | G                 | G        |
| chr2:29287926                       | <i>C2orf71</i>  | c.3676     | <b>C</b>  | C               | T        | C            | C        | C                 | C        |
| chr3:150690476                      | <i>CLRN1</i>    | c.20       | <b>T</b>  | A               | A        | T            | T        | T                 | T        |
| chr4:15982166                       | <i>PROM1</i>    | c.2374-6   | <b>A</b>  | A               | G        | A            | A        | A                 | A        |
| chr11:61725599                      | <i>BEST1</i>    | c.715-19   | <b>A</b>  | C               | C        | A            | A        | A                 | A        |
| chr11:61725615                      | <i>BEST1</i>    | c.715-3    | <b>C</b>  | T               | T        | C            | C        | C                 | C        |
| chr16:53672338                      | <i>RPGRIP1L</i> | c.2959-15  | <b>A</b>  | A               | G        | A            | A        | A                 | A        |
| <b><i>NAI8907</i></b>               |                 |            |           |                 |          |              |          |                   |          |
| chr1:94517166                       | <i>ABCA4</i>    | c.2653+23  | <b>G</b>  | C               | C        | G            | G        | G                 | G        |
| chr2:29287926                       | <i>C2orf71</i>  | c.3676     | <b>C</b>  | C               | T        | C            | C        | C                 | C        |
| chr3:150690476                      | <i>CLRN1</i>    | c.20       | <b>T</b>  | A               | A        | T            | T        | T                 | T        |
| chr4:15982166                       | <i>PROM1</i>    | c.2374-6   | <b>A</b>  | A               | G        | A            | A        | A                 | A        |
| chr10:95405667                      | <i>PDE6C</i>    | c.1848-50  | <b>A</b>  | G               | G        | del2         | del2     | del2              | del2     |
| chr11:61725599                      | <i>BEST1</i>    | c.715-19   | <b>A</b>  | C               | C        | A            | A        | A                 | A        |
| chr11:61725615                      | <i>BEST1</i>    | c.715-3    | <b>C</b>  | T               | T        | C            | C        | C                 | C        |
| chr11:76895772                      | <i>MYO7A</i>    | c.3503+12  | <b>G</b>  | G               | A        | G            | del22    | G                 | del22    |

| Genomic co-ordinate ( <i>hg19</i> ) | Gene           | Annotation | Reference | OMNI microarray |   | WGS pipeline |       | Sanger sequencing |       |
|-------------------------------------|----------------|------------|-----------|-----------------|---|--------------|-------|-------------------|-------|
| <b><i>NAI9005</i></b>               |                |            |           |                 |   |              |       |                   |       |
| chr1:94517166                       | <i>ABCA4</i>   | c.2653+23  | <b>G</b>  | C               | C | G            | G     | G                 | G     |
| chr2:29287926                       | <i>C2orf71</i> | c.3676     | <b>C</b>  | T               | T | C            | C     | C                 | C     |
| chr3:150690476                      | <i>CLRN1</i>   | c.20       | <b>T</b>  | A               | A | T            | T     | T                 | T     |
| chr4:15982166                       | <i>PROM1</i>   | c.2374-6   | <b>A</b>  | A               | G | A            | A     | A                 | A     |
| chr10:73553177                      | <i>CDH23</i>   | c.6492     | <b>C</b>  | C               | T | C            | C     | C                 | C     |
| chr11:61725599                      | <i>BEST1</i>   | c.715-19   | <b>A</b>  | C               | C | A            | A     | A                 | A     |
| chr11:61725615                      | <i>BEST1</i>   | c.715-3    | <b>C</b>  | T               | T | C            | C     | C                 | C     |
| chr11:76895772                      | <i>MYO7A</i>   | c.3503+12  | <b>G</b>  | G               | A | G            | del22 | G                 | del22 |
| <b><i>NAI9194</i></b>               |                |            |           |                 |   |              |       |                   |       |
| chr1:94517166                       | <i>ABCA4</i>   | c.2653+23  | <b>G</b>  | C               | C | G            | G     | G                 | G     |
| chr1:216172380                      | <i>USH2A</i>   | c.6506     | <b>A</b>  | A               | G | A            | A     | A                 | A     |
| chr1:243507682                      | <i>SDCCAG8</i> | c.1473+49  | <b>T</b>  | T               | A | T            | T     | T                 | T     |
| chr2:29287926                       | <i>C2orf71</i> | c.3676     | <b>C</b>  | C               | T | C            | C     | C                 | C     |
| chr3:150690476                      | <i>CLRN1</i>   | c.20       | <b>T</b>  | A               | A | T            | T     | T                 | T     |
| chr4:15982166                       | <i>PROM1</i>   | c.2374-6   | <b>A</b>  | A               | G | A            | A     | A                 | A     |
| chr11:61725599                      | <i>BEST1</i>   | c.715-19   | <b>A</b>  | C               | C | A            | A     | A                 | A     |
| chr11:61725615                      | <i>BEST1</i>   | c.715-3    | <b>C</b>  | T               | T | C            | C     | C                 | C     |
| chr11:76895772                      | <i>MYO7A</i>   | c.3503+12  | <b>G</b>  | G               | A | G            | del22 | G                 | del22 |
| <b><i>NAI9258</i></b>               |                |            |           |                 |   |              |       |                   |       |
| chr1:94517166                       | <i>ABCA4</i>   | c.2653+23  | <b>G</b>  | C               | C | G            | G     | G                 | G     |
| chr2:29287926                       | <i>C2orf71</i> | c.3676     | <b>C</b>  | C               | T | C            | C     | C                 | C     |
| chr3:150690476                      | <i>CLRN1</i>   | c.20       | <b>T</b>  | A               | A | T            | T     | T                 | T     |
| chr4:15982166                       | <i>PROM1</i>   | c.2374-6   | <b>A</b>  | A               | G | A            | A     | A                 | A     |
| chr4:187118042                      | <i>CYP4V2</i>  | c.414-52   | <b>C</b>  | T               | T | del2         | del2  | del2              | del2  |
| chr11:61725599                      | <i>BEST1</i>   | c.715-19   | <b>A</b>  | C               | C | A            | A     | A                 | A     |
| chr11:61725615                      | <i>BEST1</i>   | c.715-3    | <b>C</b>  | T               | T | C            | C     | C                 | C     |
| chr11:76895772                      | <i>MYO7A</i>   | c.3503+12  | <b>G</b>  | G               | A | G            | del22 | G                 | del22 |
