# Supplementary material for: Whole Genome Sequencing Increases Molecular Diagnostic Yield Compared with Current Diagnostic Testing for Inherited Retinal Disease
Source: PubMed Central journal article supplement (PMC4845717; doi:10.1016/j.ophtha.2016.01.009), 2016-05
Supplement: mmc6.pdf [file mmc6.pdf]

**Table 7. Sensitivity of the WGS pipeline for six control samples.** Regions of interest include: the hypothesized enrichment region (+/- 50 intronic base pairs of the coding region) for *180 genes* (Table 2, available at <http://www.aaojournal.org/>); the *exome*, the region classified as protein-coding in the *hg19* reference genome by Complete Genomics; and the *genome*, the whole genomic region. *HG* and *NA* refer to the Coriell Institute for Medical Research (<https://www.coriell.org/>) identifiers for the DNA samples. Estimated measurements assume a 2.16% error rate in the Illumina OMNI v2.5 microarray.

| Coriell ID       | # sites surveyed | # observed no-calls | # observed discordances | # observed concordances | True positives | False negatives | Sensitivity  | Estimated False negatives | Estimated Sensitivity |
|------------------|------------------|---------------------|-------------------------|-------------------------|----------------|-----------------|--------------|---------------------------|-----------------------|
| <b>180-genes</b> |                  |                     |                         |                         |                |                 |              |                           |                       |
| HG01970          | 3676             | 23                  | 134                     | 3519                    | 3519           | 157             | 0.957        | 78                        | 0.978                 |
| NA18533          | 3937             | 23                  | 156                     | 3758                    | 3758           | 179             | 0.955        | 94                        | 0.976                 |
| NA18907          | 4434             | 26                  | 138                     | 4270                    | 4270           | 164             | 0.963        | 68                        | 0.984                 |
| NA19005          | 4011             | 27                  | 173                     | 3811                    | 3811           | 200             | 0.950        | 113                       | 0.971                 |
| NA19194          | 4436             | 30                  | 145                     | 4258                    | 4258           | 178             | 0.960        | 82                        | 0.981                 |
| NA19258          | 4418             | 38                  | 148                     | 4232                    | 4232           | 186             | 0.958        | 91                        | 0.979                 |
|                  |                  |                     |                         |                         |                |                 | <b>0.957</b> |                           | <b>0.978</b>          |
| <b>exome</b>     |                  |                     |                         |                         |                |                 |              |                           |                       |
| HG01970          | 20030            | 142                 | 499                     | 19389                   | 19389          | 641             | 0.968        | 208                       | 0.989                 |
| NA18533          | 21218            | 130                 | 543                     | 20545                   | 20545          | 673             | 0.968        | 215                       | 0.990                 |
| NA18907          | 24909            | 160                 | 491                     | 24258                   | 24258          | 651             | 0.974        | 113                       | 0.995                 |
| NA19005          | 20844            | 174                 | 629                     | 20041                   | 20041          | 803             | 0.961        | 353                       | 0.983                 |
| NA19194          | 24453            | 212                 | 591                     | 23650                   | 23650          | 803             | 0.967        | 275                       | 0.989                 |
| NA19258          | 24181            | 273                 | 555                     | 23353                   | 23353          | 828             | 0.966        | 306                       | 0.987                 |
|                  |                  |                     |                         |                         |                |                 | <b>0.967</b> |                           | <b>0.989</b>          |
| <b>genome</b>    |                  |                     |                         |                         |                |                 |              |                           |                       |
| HG01970          | 701532           | 6403                | 24237                   | 670892                  | 670892         | 30640           | 0.956        | 15487                     | 0.977                 |
| NA18533          | 734586           | 6850                | 26081                   | 701655                  | 701655         | 32931           | 0.955        | 17064                     | 0.976                 |
| NA18907          | 826732           | 8754                | 24514                   | 793464                  | 793464         | 33268           | 0.960        | 15411                     | 0.981                 |
| NA19005          | 731713           | 7117                | 29080                   | 695516                  | 695516         | 36197           | 0.951        | 20392                     | 0.972                 |
| NA19194          | 804975           | 8859                | 27170                   | 768945                  | 768945         | 36029           | 0.955        | 18642                     | 0.976                 |
| NA19258          | 805704           | 8278                | 26146                   | 771279                  | 771279         | 34424           | 0.957        | 17021                     | 0.978                 |
|                  |                  |                     |                         |                         |                |                 | <b>0.956</b> |                           | <b>0.977</b>          |
