# Supplementary material for: Whole Genome Sequencing Increases Molecular Diagnostic Yield Compared with Current Diagnostic Testing for Inherited Retinal Disease
Source: PubMed Central journal article supplement (PMC4845717; doi:10.1016/j.ophtha.2016.01.009), 2016-05
Supplement: mmc9.pdf [file mmc9.pdf]

**Table 11. Intronic variants outside the +5/-5 intronic regions of coding transcripts now surveyed by targeted NGS.**

| <b>Gene</b>   | <b>cDNA</b>     | <b>Genomic co-ordinate</b> |
|---------------|-----------------|----------------------------|
| <i>ABCA4</i>  | c.4539+2001 G>A | chr1:94493000              |
| <i>ABCA4</i>  | c.4539+2028 C>T | chr1:94492973              |
| <i>ABCA4</i>  | c.5196+1056 A>G | chr1:94484082              |
| <i>ABCA4</i>  | c.5196+1137 G>A | chr1:94484001              |
| <i>ABCA4</i>  | c.5196+1216 C>A | chr1:94483922              |
| <i>ABCA4</i>  | c.5461-10 T>C   | chr1:94476951              |
| <i>CEP290</i> | c.2991+1655 A>G | chr12:88494960             |
| <i>OFDI</i>   | c.935+706 A>G   | chrX:13768358              |
| <i>USH2A</i>  | c.7595-2144 A>G | chr1:216064540             |
