# Supplementary material for: Whole Genome Sequencing Increases Molecular Diagnostic Yield Compared with Current Diagnostic Testing for Inherited Retinal Disease
Source: PubMed Central journal article supplement (PMC4845717; doi:10.1016/j.ophtha.2016.01.009), 2016-05
Supplement: mmc10.pdf [file mmc10.pdf]

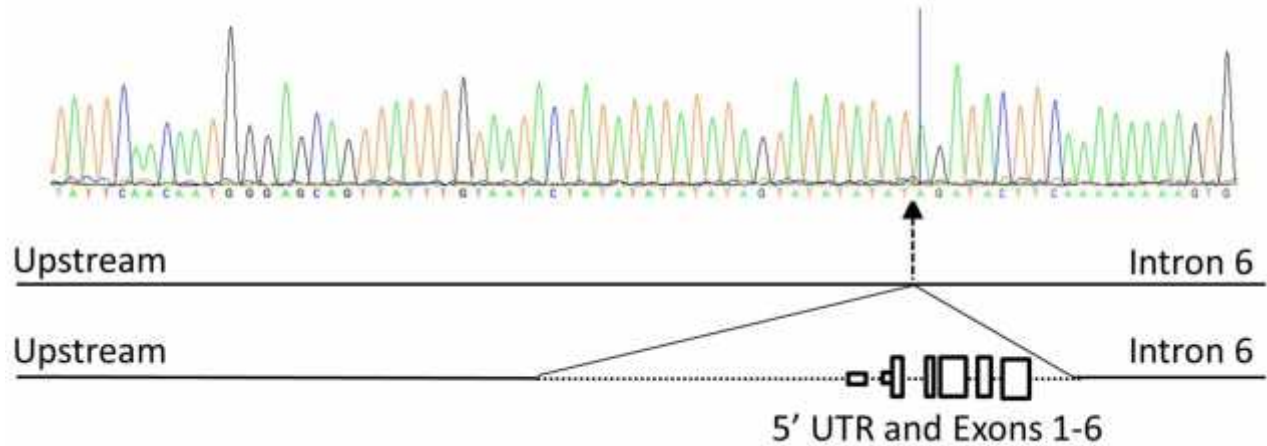

**Figure 4. Sanger sequencing chromatogram for patient 12002355**, showing a heterozygous deletion removing the start codon and first 6 coding exons of the *PCDH15* gene (chr10:56,094,632-56,613,219; *PCDH15* c.-189197\_c.610-5166, NM\_001142763.1). Large structural rearrangements have previously been assigned as the cause of Usher syndrome in the *PCDH15* gene, including single and multiple exon deletions.<sup>1-3</sup>

1. Jaijo T, Oshima A, Aller E, et al. Mutation screening of the *PCDH15* gene in Spanish patients with Usher syndrome type I. *Molecular Vision* 2012;18:1719-26.
2. Roux AF, Faugere V, Le Guedard S, et al. Survey of the frequency of *USH1* gene mutations in a cohort of Usher patients shows the importance of cadherin 23 and protocadherin 15 genes and establishes a detection rate of above 90%. *Journal of Medical Genetics* 2006;43:763-8.
3. Glockle N, Kohl S, Mohr J, et al. Panel-based next generation sequencing as a reliable and efficient technique to detect mutations in unselected patients with retinal dystrophies. *Eur J Hum Genet* 2014;22:99-104.
