# Supplementary material for: Whole Genome Sequencing Increases Molecular Diagnostic Yield Compared with Current Diagnostic Testing for Inherited Retinal Disease
Source: PubMed Central journal article supplement (PMC4845717; doi:10.1016/j.ophtha.2016.01.009), 2016-05
Supplement: mmc11.pdf [file mmc11.pdf]

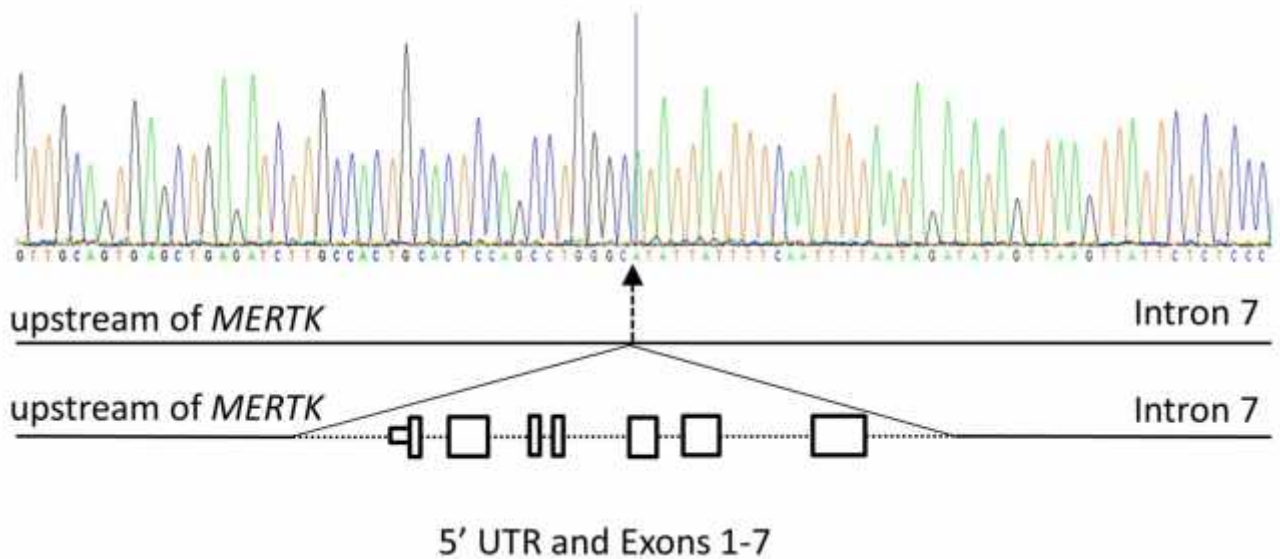

**Figure 5. Sanger sequencing chromatogram for patient 065240**, showing a homozygous deletion removing the start codon and first 7 coding exons of the *MERTK* gene (chr2:112,648,150-112,739,206; *MERTK* c.-8163\_c.1145-1213, NM\_006343.2). c.-8163\_c.1145-1213 has not been reported in the literature previously, but an almost identical 91kb deletion which also removes the first 7 coding exons, has been reported as in a homozygous state in patients with retinitis pigmentosa.<sup>1</sup>

1. Ostergaard E, Duno M, Batbayli M, Vilhelmsen K, Rosenberg T. A novel *MERTK* deletion is a common founder mutation in the Faroe Islands and is responsible for a high proportion of retinitis pigmentosa cases. *Mol Vis* 2011;17:1485-92.
