# Supplementary material for: Whole Genome Sequencing Increases Molecular Diagnostic Yield Compared with Current Diagnostic Testing for Inherited Retinal Disease
Source: PubMed Central journal article supplement (PMC4845717; doi:10.1016/j.ophtha.2016.01.009), 2016-05
Supplement: mmc12.pdf [file mmc12.pdf]

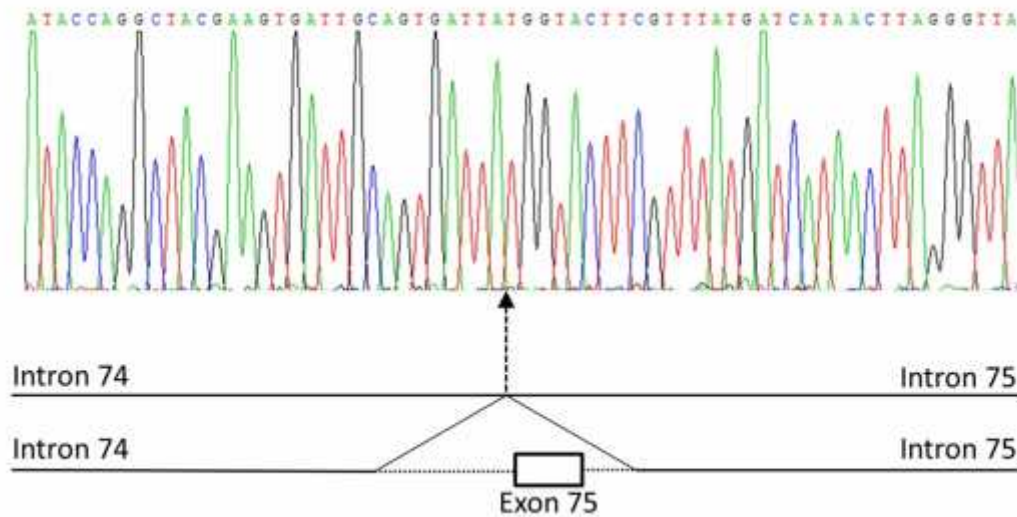

**Figure 6. Sanger sequencing chromatogram for patient 11012351, showing a heterozygous deletion removing a single exon from the reading frame of the *GPR98* gene (chr5:90,109,981-90,111,708; *GPR98* c.16079-1455\_c.16196+155del, p.(Ser5361Profs\*25); NM\_032119.3). c.16079-1455\_c.16196+155del has not been previously reported in the literature, however it is expected to cause the deletion of exon 75 and flanking intronic regions of *GPR98*. Deletions that cause the removal of whole exons in *GPR98* have previously been reported in patients with Usher syndrome,<sup>1</sup> and the removal of exon 75 is predicted to cause premature termination of the *GPR98* protein product.**

1. Hilgert N, Kahrizi K, Dieltjens N, et al. A large deletion in *GPR98* causes type IIC Usher syndrome in male and female members of an Iranian family. *J Med Genet* 2009;46:272-6.
