# Supplementary material for: Whole Genome Sequencing Increases Molecular Diagnostic Yield Compared with Current Diagnostic Testing for Inherited Retinal Disease
Source: PubMed Central journal article supplement (PMC4845717; doi:10.1016/j.ophtha.2016.01.009), 2016-05
Supplement: mmc13.pdf [file mmc13.pdf]

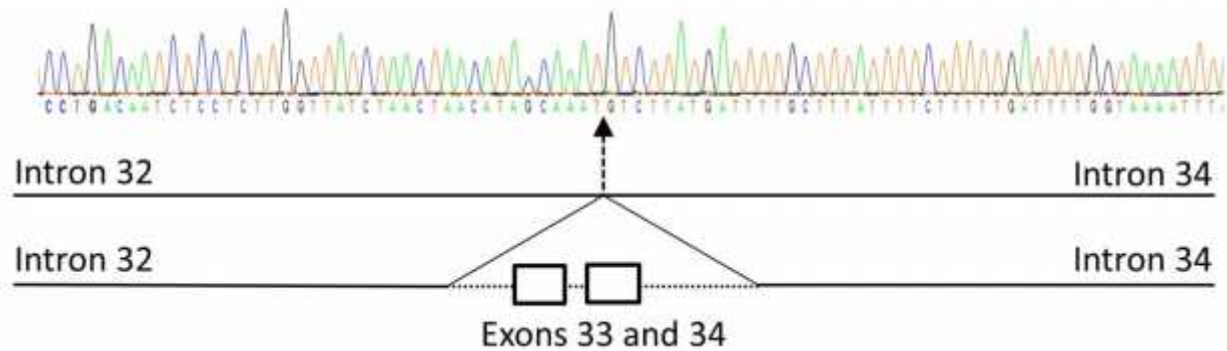

**Figure 7. Sanger sequencing chromatogram for patient 12008422**, showing a heterozygous deletion removing two exons from the reading frame from the *USH2A* gene (chr1:216,167,537-216,177,486; *USH2A* c.6326-3582\_6658-1028del, p.(Asp2109Glyfs\*11), NM\_206933.2). Heterozygous whole exon deletions have previously been reported as pathogenic in the *USH2A* gene.<sup>1,2</sup>

1. Baux D, Blanchet C, Hamel C, et al. Enrichment of LOVD-USHbases with 152 *USH2A* Genotypes Defines an Extensive Mutational Spectrum and Highlights Missense Hotspots. *Hum Mutat* 2014.
2. Krawitz PM, Schiska D, Krüger U, et al. Screening for single nucleotide variants, small indels and exon deletions with a next-generation sequencing based gene panel approach for Usher syndrome. *Molecular Genetics & Genomic Medicine* 2014:n/a-n/a.
