# Supplementary material for: Whole Genome Sequencing Increases Molecular Diagnostic Yield Compared with Current Diagnostic Testing for Inherited Retinal Disease
Source: PubMed Central journal article supplement (PMC4845717; doi:10.1016/j.ophtha.2016.01.009), 2016-05
Supplement: mmc16.pdf [file mmc16.pdf]

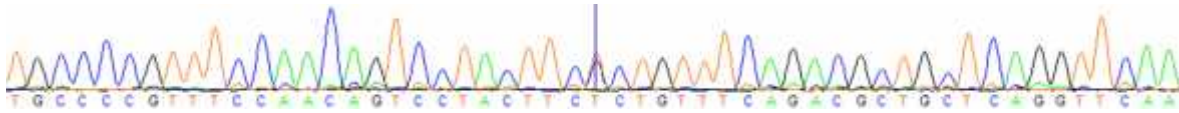

**Figure 10. Sanger sequencing chromatogram for patient 12007903**, showing a heterozygous intronic variant in the *ABCA4* gene (chr1:94,476,951; *ABCA4* c.5461-10T>C, NM\_000350.2). c.5461-10T>C is known to segregate with clinical presentation of IRD,<sup>1-4</sup> but functional mechanism of pathogenesis is unknown.

1. Jonsson F, Burstedt MS, Sandgren O, Norberg A, Golovleva I. Novel mutations in *CRB1* and *ABCA4* genes cause Leber congenital amaurosis and Stargardt disease in a Swedish family. *Eur J Hum Genet* 2013;21:1266-71.
2. Zernant J, Schubert C, Im KM, et al. Analysis of the *ABCA4* gene by next-generation sequencing. *Invest Ophthalmol Vis Sci* 2011;52:8479-87.
3. Fujinami K, Zernant J, Chana RK, et al. *ABCA4* gene screening by next-generation sequencing in a British cohort. *Invest Ophthalmol Vis Sci* 2013;54:6662-74.
4. Utz VM, Coussa RG, Marino MJ, et al. Predictors of visual acuity and genotype-phenotype correlates in a cohort of patients with Stargardt disease. *Br J Ophthalmol* 2014;98:513-8.
