# Supplementary material for: Whole Genome Sequencing Increases Molecular Diagnostic Yield Compared with Current Diagnostic Testing for Inherited Retinal Disease
Source: PubMed Central journal article supplement (PMC4845717; doi:10.1016/j.ophtha.2016.01.009), 2016-05
Supplement: mmc17.pdf [file mmc17.pdf]

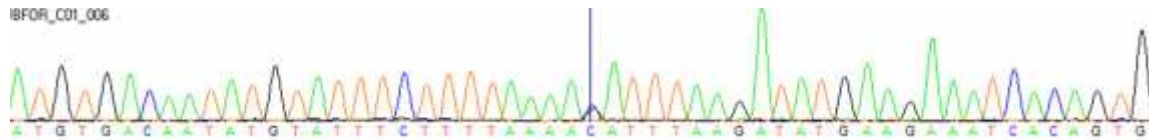

**Figure 11. Sanger sequencing chromatogram for patient 11012351**, showing a heterozygous intronic variant predicted to affect splicing in the *GPR98* gene (chr5:89,924,371; *GPR98* c.1239-8C>G, NM\_032119.3). c.1239-8C>G has not previously been reported in the literature, however *in-silico* predictions suggest that it introduces a strong 3' splicing site before the 3' canonical splicing site of exon 8. Mutations that disrupt splicing in *GPR98* have been previously reported as pathogenic in patients with Usher syndrome.<sup>1,2</sup>

1. Le Quesne Stabej P, Saihan Z, Rangesh N, et al. Comprehensive sequence analysis of nine Usher syndrome genes in the UK National Collaborative Usher Study. *J Med Genet* 2012;49:27-36.
2. Garcia-Garcia G, Besnard T, Baux D, et al. The contribution of *GPR98* and *DFNB31* genes to a Spanish Usher syndrome type 2 cohort. *Mol Vis* 2013;19:367-73.
