# Supplementary material for: Whole Genome Sequencing Increases Molecular Diagnostic Yield Compared with Current Diagnostic Testing for Inherited Retinal Disease
Source: PubMed Central journal article supplement (PMC4845717; doi:10.1016/j.ophtha.2016.01.009), 2016-05
Supplement: mmc18.pdf [file mmc18.pdf]

193F\_A01\_008

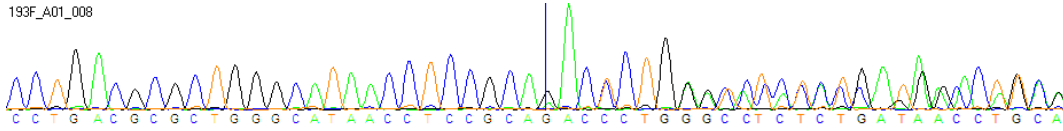

**Figure 12. Sanger sequencing chromatogram for patient 11001193**, showing a heterozygous deletion which removes part of the coding sequence of the *PDE6B* gene (chr4:657,561-657,607; *PDE6B* c.1923\_1969delinsTCTGGG, p.(Asn643Glyfs\*29), NM\_000283.3). c.1923\_1969delinsTCTGGG is predicted to disrupt the normal translation of the *PDE6B* gene and a different frameshift mutation, c.1927\_1969delinsGG, which has the same predicted protein change, p.(Asn643Glyfs\*29), has been reported previously in a compound heterozygous state in patients with retinitis pigmentosa.<sup>1</sup>

1. Neveling K, Collin RWJ, Gilissen C, et al. Next-Generation Genetic Testing for Retinitis Pigmentosa. *Human Mutation* 2012;33:963-72.
