# Supplementary material for: Whole Genome Sequencing Increases Molecular Diagnostic Yield Compared with Current Diagnostic Testing for Inherited Retinal Disease
Source: PubMed Central journal article supplement (PMC4845717; doi:10.1016/j.ophtha.2016.01.009), 2016-05
Supplement: mmc19.pdf [file mmc19.pdf]

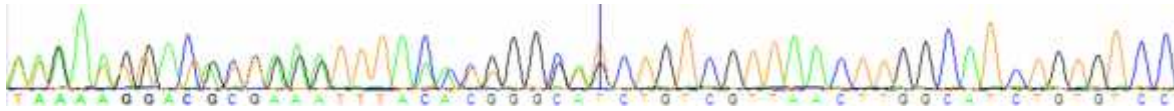

**Figure 13. Sanger sequencing chromatogram for patient 11013807**, showing a heterozygous insertion-deletion which removes part of the coding sequence of the *USH2A* gene (chr1:216,246,601; *USH2A* c.5614delinsTTAACTTGGCAT, p.(Ala1872Metfs\*4), NM\_206933.2). c.5614delinsTTAACTTGGCAT is expected to cause a shift in the reading frame and a premature termination of the *USH2A* protein product. An indel event at the same protein position as the one reported here, p.Ala1872Leufs\*58, has been previously reported in a compound heterozygous state in patients with Usher Syndrome Type II.<sup>1</sup>

1. Le Quesne Stabej P, Saihan Z, Rangesh N, et al. Comprehensive sequence analysis of nine Usher syndrome genes in the UK National Collaborative Usher Study. *J Med Genet* 2012;49:27-36.
