# Supplementary material for: Whole Genome Sequencing Increases Molecular Diagnostic Yield Compared with Current Diagnostic Testing for Inherited Retinal Disease
Source: PubMed Central journal article supplement (PMC4845717; doi:10.1016/j.ophtha.2016.01.009), 2016-05
Supplement: mmc20.pdf [file mmc20.pdf]

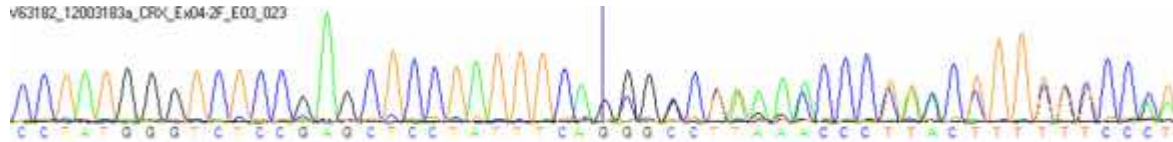

**Figure 14. Sanger sequencing chromatogram for patient 12003183**, showing a heterozygous single nucleotide deletion in the *CRX* gene (chr19:48342972; *CRX* c.648delC, p.(Ser216Argfs\*3), NM\_000554.4). c.648delC has not been reported previously in patients with retinitis pigmentosa, however it is predicted to terminate the *CRX* protein prematurely. Truncating mutations in *CRX* have been previously reported in patients with autosomal dominant Leber congenital amaurosis.<sup>1-3</sup>

1. Freund CL, Wang QL, Chen S, et al. De novo mutations in the *CRX* homeobox gene associated with Leber congenital amaurosis. *Nat Genet* 1998;18:311-2.
2. Sohocki MM, Sullivan LS, Mintz-Hittner HA, et al. A range of clinical phenotypes associated with mutations in *CRX*, a photoreceptor transcription-factor gene. *Am J Hum Genet* 1998;63:1307-15.
3. Arcot Sadagopan K, Battista R, Keep RB, Capasso JE, Levin AV. Autosomal-dominant Leber Congenital Amaurosis Caused by a Heterozygous *CRX* Mutation in a Father and Son. *Ophthalmic Genet* 2013.
