# Supplementary material for: Whole Genome Sequencing Increases Molecular Diagnostic Yield Compared with Current Diagnostic Testing for Inherited Retinal Disease
Source: PubMed Central journal article supplement (PMC4845717; doi:10.1016/j.ophtha.2016.01.009), 2016-05
Supplement: mmc24.pdf [file mmc24.pdf]

## 299 Case Study – Usher syndrome

300 A female presented with retinitis pigmentosa (RP) and congenital deafness suggesting a clinical  
301 diagnosis of Usher syndrome. There was no family history.

302

303 Targeted NGS testing identified no molecular cause. The patient carried:

304

305 i) a ‘likely pathogenic’ heterozygous variant in *IDH3B*, c.184G>T, p.(Glu62\*).

306 Mutations in *IDH3B* have previously been associated with autosomal recessive non-syndromic RP.<sup>30</sup>

307 This finding, therefore, was concluded not to contribute to the molecular diagnosis of IRD for this  
308 individual.

309 Analysis of WGS data additionally identified:

310

311 ii) a ‘likely pathogenic’ heterozygous *GPR98* non-coding variant, c.1239-8C>G

312 iii) a ‘likely pathogenic’ heterozygous deletion, c.16079-1456\_ c.16196+155del

313 p.(Ser5361Profs\*25), removing a protein-coding region (exon) of *GPR98* (Figure 3) and  
314 expected to cause premature termination of protein translation.

315 Homozygous and compound heterozygous mutations in *GPR98* cause Usher syndrome.<sup>2</sup> These

316 findings were therefore concluded to confirm a ***diagnosis of autosomal recessive Usher syndrome.***
